# Supplementary material for: pH-responsive hydrogel cubes for release of doxorubicin in cancer cells
Source: Royal Society of Chemistry journal article supplement (doi:10.1039/c4tb00165f), 2014-01-01
Supplement: c4tb00165f1.pdf [file c4tb00165f1.pdf]

Supporting Information for

pH-Responsive Hydrogel Cubes for Release of Doxorubicin in Cancer Cells

*Veronika Kozlovskaya,<sup>1 ‡</sup> Jun Chen,<sup>1 ‡</sup> Chrysanty Tedjo,<sup>1</sup> Xing Liang,<sup>1</sup> Javier Campos-Gomez,<sup>2</sup> Jonghwa Oh,<sup>3</sup> Mohammad Saeed,<sup>2</sup> Claudiu T. Lungu,<sup>3</sup> and Eugenia Kharlampieva<sup>1 \*</sup>*

<sup>1</sup>Department of Chemistry, University of Alabama at Birmingham, Birmingham, AL, USA

<sup>2</sup>Department of Biochemistry and Molecular Biology, Southern Research Institute, Drug Discovery Division, Birmingham, Alabama, USA

<sup>3</sup>Department of Environmental Health Sciences, University of Alabama at Birmingham, Birmingham, AL, USA

\*Correspondence address: 901 14<sup>th</sup> St South, CHEM294, Birmingham, AL, USA, 35294, [ekharlam@uab.edu](mailto:ekharlam@uab.edu)

<sup>‡</sup>These authors equally contributed to work

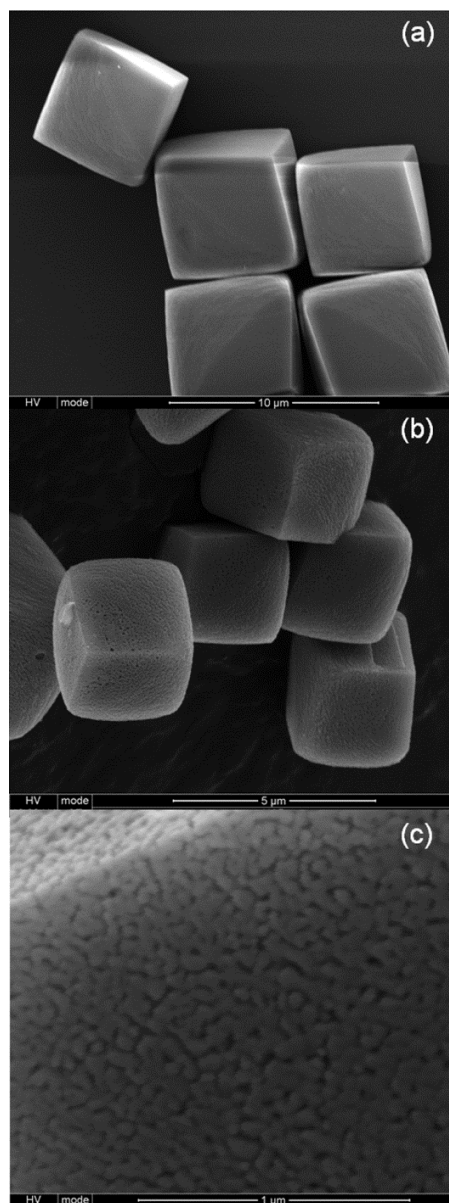

**Figure S1.** SEM images of 4 μm cubic manganese carbonate particles before (a) and after (b, c) heating at 700°C for 3 hours in air.
